# Supplementary material
Source: PubMed Central journal article supplement (PMC9112120)
Supplement: mmc2.pdf [file mmc2.pdf]

# **The impact of post-hospital monitoring of COVID-19 patients using pulse oximetry: a national observational study using hospital activity data.**

## **Supplementary material**

### **Contents**

|            |                                                                       |        |
|------------|-----------------------------------------------------------------------|--------|
| Figure S1. | Length of stay distribution for included Covid-19 spells.             | Page 2 |
| Table S1.  | Sensitivity analyses: variants of analytical models.                  | Page 2 |
| Table S2.  | Sensitivity analyses 2: effect of adding adjustment variables in turn | Page 3 |

**Figure S1. Length of stay distribution for included Covid-19 spells, split by whether CVW was available or not; proportion (a) and cumulative proportions (b) of each group. Of the discharges where no CVW was available 0.79% had LOS > 60 days. For discharges with CVW available 0.92% had LOS > 60 days. All such discharges were set to 60 days in our models.**

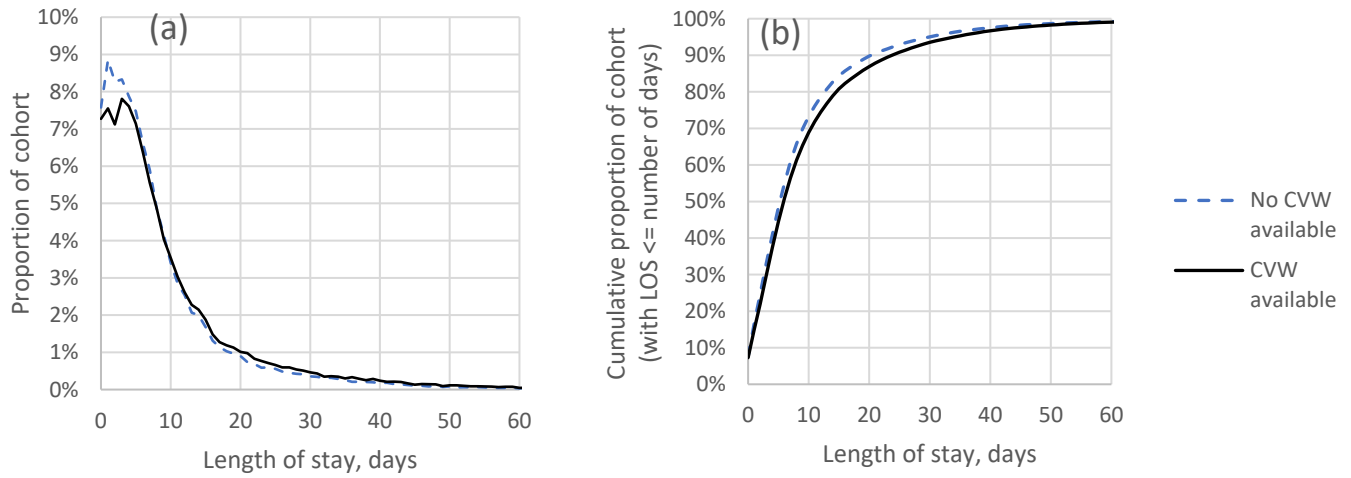

**Table S1. Sensitivity analyses: variants of analytical models. Adjusted Incidence Rate Ratios (IRR) for LOS of COVID-19 spell, and adjusted Odds Ratios (OR) of COVID-19 readmissions within 28 days: discharges with CVW available, vs not available.**

|                                      | Length of stay of COVID-19 spell |         |                             |       | Readmission for COVID-19 within 28 days |         |                            |       |
|--------------------------------------|----------------------------------|---------|-----------------------------|-------|-----------------------------------------|---------|----------------------------|-------|
|                                      | IRR                              | P value | IRR 95% confidence interval |       | OR                                      | P value | OR 95% confidence interval |       |
|                                      |                                  |         | Lower                       | Upper |                                         |         | Lower                      | Upper |
| Base models (figs 2 and 3)           | 1.05                             | 0.01    | 1.01                        | 1.09  | 0.97                                    | 0.32    | 0.91                       | 1.03  |
| Time period: 7 days                  | 1.04                             | 0.07    | 1.00                        | 1.08  | 0.98                                    | 0.44    | 0.92                       | 1.04  |
| Time period: 28 days                 | 1.08                             | 0.00    | 1.04                        | 1.12  | 0.95                                    | 0.14    | 0.90                       | 1.02  |
| Add Wave 1 data                      | 1.01                             | 0.62    | 0.97                        | 1.05  | 0.99                                    | 0.76    | 0.92                       | 1.07  |
| LOS untrimmed at 60 days             | 1.04                             | 0.04    | 1.00                        | 1.08  | -                                       | -       | -                          | -     |
| LOS disregarding pre-Covid diagnosis | 1.05                             | 0.00    | 1.02                        | 1.09  | -                                       | -       | -                          | -     |

**Table S2. Sensitivity analyses 2: Effect of adding adjustment variables in turn. Adjusted Incidence Rate Ratios (IRR) for LOS of COVID-19 spell, and adjusted Odds Ratios (OR) of COVID-19 readmissions within 28 days: discharges with CVW available, vs not available. Only one ordering shown.**

|                                                       | Length of stay of COVID-19 spell |         |                             |       | Readmission for COVID-19 within 28 days |         |                            |       |
|-------------------------------------------------------|----------------------------------|---------|-----------------------------|-------|-----------------------------------------|---------|----------------------------|-------|
|                                                       | IRR                              | P value | IRR 95% confidence interval |       | OR                                      | P value | OR 95% confidence interval |       |
|                                                       |                                  |         | Lower                       | Upper |                                         |         | Lower                      | Upper |
| Unadjusted                                            | 1.13                             | <.0001  | 1.11                        | 1.14  | 0.98                                    | 0.14    | 0.95                       | 1.01  |
| Adjusted: By time period                              | 1.00                             | 0.88    | 0.99                        | 1.01  | 1.03                                    | 0.14    | 0.99                       | 1.06  |
| + (Cluster by provider trust)                         | 1.05                             | 0.03    | 1.00                        | 1.10  | 0.98                                    | 0.50    | 0.92                       | 1.04  |
| + Age                                                 | 1.05                             | 0.02    | 1.01                        | 1.09  | 0.99                                    | 0.67    | 0.93                       | 1.05  |
| + Charlson                                            | 1.05                             | 0.03    | 1.01                        | 1.09  | 0.98                                    | 0.56    | 0.92                       | 1.05  |
| + Deprivation +Ethnic group +Gender                   | 1.05                             | 0.02    | 1.01                        | 1.09  | 0.98                                    | 0.47    | 0.92                       | 1.04  |
| + Emergency +First +Proportion of beds occupied COVID | 1.05                             | 0.01    | 1.01                        | 1.09  | 0.97                                    | 0.32    | 0.91                       | 1.03  |
